# Supplementary material
Source: PubMed Central journal article supplement (PMC5500451)
Supplement: NIHMS837554-supplement-supplement_1.pdf [file NIHMS837554-supplement-supplement_1.pdf]

**Supplemental Table 1.** Mean +/- standard deviation of CVR lagtime and maximum CVR (data corresponds with that shown in **Figures 3 and 4**). The number of patients (Pts) and sub-territories included in each group is shown. Wilcoxon rank-sum corrected *p*-values refer to comparison of territories with proximal vessel disease to those without discernible proximal disease (row 1).

| <b>Atherosclerosis patients</b>                                       |            |                        |                        |                |                              |                |
|-----------------------------------------------------------------------|------------|------------------------|------------------------|----------------|------------------------------|----------------|
| <b>Patient category</b>                                               | <b>Pts</b> | <b>Sub-Territories</b> | <b>CVR lagtime (s)</b> | <b>P value</b> | <b>Max CVR (z-statistic)</b> | <b>P value</b> |
| NO proximal vessel wall lesion or stenosis                            | 16         | 104                    | 35.0±7.2               |                | 10.3±1.3                     |                |
| Proximal vessel wall lesion or stenosis                               | 15         | 216                    | 38.2±9.1               | 0.001          | 10.2±1.6                     | 0.5            |
| Proximal vessel wall lesion or stenosis, remove infarcted territories | 15         | 209                    | 38.1±9.1               | 0.002          | 10.3±1.6                     | 0.7            |
| Proximal vessel wall lesion                                           | 14         | 208                    | 38.5±9.2               | <0.001         | 10.2±1.7                     | 0.4            |
| Proximal vessel wall lesion only                                      | 10         | 110                    | 36.7±9.1               | 0.05           | 10.0±1.6                     | 0.05           |
| Proximal stenosis                                                     | 15         | 98                     | 40.7±9.0               | <0.001         | 10.4±1.6                     | 0.7            |
| <b>Moyamoya patients</b>                                              |            |                        |                        |                |                              |                |
| <b>Patient category</b>                                               | <b>Pts</b> | <b>Sub-Territories</b> | <b>CVR lagtime (s)</b> | <b>P value</b> | <b>Max CVR (z-statistic)</b> | <b>P value</b> |
| NO proximal vessel wall lesion or stenosis                            | 18         | 114                    | 35.7±9.7               |                | 12.0±2.4                     |                |
| Proximal vessel wall lesion or stenosis                               | 20         | 286                    | 45.5±14.2              | <0.001         | 9.8±2.2                      | <0.001         |
| Proximal vessel wall lesion or stenosis, remove infarcted territories | 20         | 266                    | 45.3±14.2              | <0.001         | 9.9±2.1                      | <0.001         |
| Proximal vessel wall lesion                                           | 20         | 264                    | 46.6±14.1              | <0.001         | 9.7±2.1                      | <0.001         |
| Proximal stenosis                                                     | 20         | 266                    | 45.1±14.1              | <0.001         | 9.7±2.2                      | <0.001         |
